# Supplementary material for: A community‐based lung cancer rapid tissue donation protocol provides high‐quality drug‐resistant specimens for proteogenomic analyses
Source: PubMed Central journal article supplement (PMC6943158; doi:10.1002/cam4.2670), 2019-11-20
Supplement: CAM4-9-225-s002.pdf [file CAM4-9-225-s002.pdf]

Supplementary Table 1: Applied cutoffs for IHC markers based on semi-quantitative pathological assessment

|              |                   |                    |               |
|--------------|-------------------|--------------------|---------------|
| Ki67 (%TPS)  | Low: 0-25         | Medium: 25-50      | High: over 50 |
| CD8 (%)      | Low: below 1      | Medium: 1-5        | High: over 5  |
| PD-L1 (%TPS) | Negative: below 1 | Positive: $\geq 1$ |               |

Supplementary Table 2: Coding Regions

| <b>Gene Symbol</b> | <b>Gene Description</b>                                                            | <b>Entrez Gene ID</b> |
|--------------------|------------------------------------------------------------------------------------|-----------------------|
| ABL1               | c-abl oncogene 1, receptor tyrosine kinase                                         | 25                    |
| ABL2               | v-abl Abelson murine leukemia viral oncogene homolog 2 (arg, Abelson-related gene) | 27                    |
| ACTL6A             | actin-like 6A                                                                      | 86                    |
| ACTL6B             | actin-like 6B                                                                      | 51412                 |
| ACVR1B             | activin A receptor, type IB                                                        | 91                    |
| ACVR2A             | activin A receptor type 2A                                                         | 92                    |
| ADGRA2             | adhesion G protein-coupled receptor A2                                             | 25960                 |
| AFF2               | AF4/FMR2 family, member 2                                                          | 2334                  |
| AJUBA              | ajuba LIM protein                                                                  | 84962                 |
| AKT1               | v-akt murine thymoma viral oncogene homolog 1                                      | 207                   |
| AKT2               | v-akt murine thymoma viral oncogene homolog 2                                      | 208                   |
| AKT3               | v-akt murine thymoma viral oncogene homolog 3 (protein kinase B, gamma)            | 10000                 |
| ALK                | anaplastic lymphoma receptor tyrosine kinase                                       | 238                   |
| ALOX12B            | arachidonate 12-lipoxygenase, 12R type                                             | 242                   |
| AMER1              | APC membrane recruitment protein 1                                                 | 139285                |
| ANAPC1             | anaphase promoting complex subunit 1                                               | 64682                 |
| ANO1               | anoctamin 1, calcium activated chloride channel                                    | 55107                 |
| APC                | adenomatous polyposis coli                                                         | 324                   |
| AR                 | androgen receptor                                                                  | 367                   |
| ARAF               | v-raf murine sarcoma 3611 viral oncogene homolog                                   | 369                   |
| ARFRP1             | ADP-ribosylation factor related protein 1                                          | 10139                 |
| ARHGEF39           | Rho guanine nucleotide exchange factor (GEF) 39                                    | 84904                 |
| ARID1A             | AT rich interactive domain 1A (SWI-like)                                           | 8289                  |
| ARID1B             | AT rich interactive domain 1B (SWI1-like)                                          | 57492                 |
| ARID2              | AT rich interactive domain 2 (ARID, RFX-like)                                      | 196528                |
| ARID5B             | AT-rich interaction domain 5B                                                      | 84159                 |
| ATAD2              | ATPase family, AAA domain containing 2                                             | 29028                 |

|         |                                                                                                                    |       |
|---------|--------------------------------------------------------------------------------------------------------------------|-------|
| ATM     | similar to Serine-protein kinase ATM (Ataxia telangiectasia mutated) (A-T, mutated); ataxia telangiectasia mutated | 472   |
| ATR     | ataxia telangiectasia and Rad3 related; similar to ataxia telangiectasia and Rad3 related protein                  | 545   |
| ATRX    | alpha thalassemia/mental retardation syndrome X-linked (RAD54 homolog, <i>S. cerevisiae</i> )                      | 546   |
| AURKA   | aurora kinase A; aurora kinase A pseudogene 1                                                                      | 6790  |
| AURKB   | aurora kinase B                                                                                                    | 9212  |
| AXIN1   | axin 1                                                                                                             | 8312  |
| AXL     | AXL receptor tyrosine kinase                                                                                       | 558   |
| B3GAT1  | beta-1,3-glucuronyltransferase 1 (glucuronosyltransferase P)                                                       | 27087 |
| BACH1   | BTB and CNC homology 1, basic leucine zipper transcription factor 1                                                | 571   |
| BACH2   | BTB and CNC homology 1, basic leucine zipper transcription factor 2                                                | 60468 |
| BAP1    | BRCA1 associated protein-1 (ubiquitin carboxy-terminal hydrolase)                                                  | 8314  |
| BARD1   | BRCA1 associated RING domain 1                                                                                     | 580   |
| BCL11A  | B-cell CLL/lymphoma 11A                                                                                            | 53335 |
| BCL11B  | B-cell CLL/lymphoma 11B                                                                                            | 64919 |
| BCL2    | B-cell CLL/lymphoma 2                                                                                              | 596   |
| BCL2A1  | BCL2-related protein A1                                                                                            | 597   |
| BCL2L1  | BCL2-like 1                                                                                                        | 598   |
| BCL2L11 | BCL2-like 11 (apoptosis facilitator)                                                                               | 10018 |
| BCL3    | B-cell CLL/lymphoma 3                                                                                              | 602   |
| BCL6    | B-cell CLL/lymphoma 6                                                                                              | 604   |
| BCL7A   | BCL tumor suppressor 7A                                                                                            | 605   |
| BCL7B   | BCL tumor suppressor 7B                                                                                            | 9275  |
| BCL7C   | BCL tumor suppressor 7C                                                                                            | 9274  |
| BCOR    | BCL6 co-repressor                                                                                                  | 54880 |
| BDH1    | 3-hydroxybutyrate dehydrogenase, type 1                                                                            | 622   |
| BIRC2   | baculoviral IAP repeat-containing 2                                                                                | 329   |
| BIRC3   | baculoviral IAP repeat-containing 3                                                                                | 330   |
| BIRC7   | baculoviral IAP repeat-containing 7                                                                                | 79444 |
| BLM     | Bloom syndrome, RecQ helicase-like                                                                                 | 641   |
| BOK     | BCL2-related ovarian killer                                                                                        | 666   |

|         |                                                                                                    |        |
|---------|----------------------------------------------------------------------------------------------------|--------|
| BRAF    | v-raf murine sarcoma viral oncogene homolog B1                                                     | 673    |
| BRCA1   | breast cancer 1, early onset                                                                       | 672    |
| BRCA2   | breast cancer 2, early onset                                                                       | 675    |
| BRD4    | bromodomain containing 4                                                                           | 23476  |
| BRD7    | bromodomain containing 7; bromodomain containing 7 pseudogene 2                                    | 29117  |
| BRD9    | bromodomain containing 9                                                                           | 65980  |
| BRIP1   | BRCA1 interacting protein C-terminal helicase 1                                                    | 83990  |
| BTG1    | B-cell translocation gene 1, anti-proliferative                                                    | 694    |
| BTK     | Bruton agammaglobulinemia tyrosine kinase                                                          | 695    |
| CABLES1 | Cdk5 and Abl enzyme substrate 1                                                                    | 91768  |
| CARD11  | caspase recruitment domain family, member 11                                                       | 84433  |
| CASP8   | caspase 8, apoptosis-related cysteine peptidase                                                    | 841    |
| CBFB    | core-binding factor, beta subunit                                                                  | 865    |
| CBL     | Cas-Br-M (murine) ecotropic retroviral transforming sequence                                       | 867    |
| CCDC89  | coiled-coil domain containing 89                                                                   | 220388 |
| CCND1   | cyclin D1                                                                                          | 595    |
| CCND2   | cyclin D2                                                                                          | 894    |
| CCND3   | cyclin D3                                                                                          | 896    |
| CCNE1   | cyclin E1                                                                                          | 898    |
| CCSER1  | coiled-coil serine rich protein 1                                                                  | 401145 |
| CD19    | CD19 molecule                                                                                      | 930    |
| CD274   | CD274 molecule                                                                                     | 29126  |
| CD79A   | CD79a molecule, immunoglobulin-associated alpha                                                    | 973    |
| CD79B   | CD79b molecule, immunoglobulin-associated beta                                                     | 974    |
| CDC73   | cell division cycle 73, Paf1/RNA polymerase II complex component, homolog ( <i>S. cerevisiae</i> ) | 79577  |
| CDH1    | cadherin 1, type 1, E-cadherin (epithelial)                                                        | 999    |
| CDH13   | cadherin 13, H-cadherin (heart)                                                                    | 1012   |
| CDH20   | cadherin 20, type 2                                                                                | 28316  |
| CDH3    | cadherin 3                                                                                         | 1001   |

|        |                                                                                              |        |
|--------|----------------------------------------------------------------------------------------------|--------|
| CDH5   | cadherin 5, type 2 (vascular endothelium)                                                    | 1003   |
| CDH6   | cadherin 6                                                                                   | 1004   |
| CDK12  | Cdc2-related kinase, arginine/serine-rich                                                    | 51755  |
| CDK17  | PCTAIRE protein kinase 2                                                                     | 5128   |
| CDK2   | cyclin dependent kinase 2                                                                    | 1017   |
| CDK4   | cyclin-dependent kinase 4                                                                    | 1019   |
| CDK6   | cyclin-dependent kinase 6                                                                    | 1021   |
| CDKN1A | cyclin dependent kinase inhibitor 1A                                                         | 1026   |
| CDKN1B | cyclin-dependent kinase inhibitor 1B (p27, Kip1)                                             | 1027   |
| CDKN2A | cyclin-dependent kinase inhibitor 2A (melanoma, p16, inhibits CDK4)                          | 1029   |
| CDKN2B | cyclin-dependent kinase inhibitor 2B (p15, inhibits CDK4)                                    | 1030   |
| CDKN2C | cyclin-dependent kinase inhibitor 2C (p18, inhibits CDK4)                                    | 1031   |
| CEBPA  | CCAAT/enhancer binding protein (C/EBP), alpha                                                | 1050   |
| CHD1   | chromodomain helicase DNA binding protein 1                                                  | 1105   |
| CHD3   | chromodomain helicase DNA binding protein 3                                                  | 1107   |
| CHD4   | chromodomain helicase DNA binding protein 4                                                  | 1108   |
| CHD5   | chromodomain helicase DNA binding protein 5                                                  | 26038  |
| CHEK2  | protein kinase CHK2-like; CHK2 checkpoint homolog ( <i>S. pombe</i> ); similar to hCG1983233 | 11200  |
| CHFR   | checkpoint with forkhead and ring finger domains                                             | 55743  |
| CHSY3  | chondroitin sulfate synthase 3                                                               | 337876 |
| CHUK   | conserved helix-loop-helix ubiquitous kinase                                                 | 1147   |
| CIC    | capicua homolog ( <i>Drosophila</i> )                                                        | 23152  |
| COPS5  | COP9 constitutive photomorphogenic homolog subunit 5 ( <i>Arabidopsis</i> )                  | 10987  |
| COX18  | COX18 cytochrome c oxidase assembly homolog ( <i>S. cerevisiae</i> )                         | 285521 |
| CPSF3  | cleavage and polyadenylation specific factor 3                                               | 51692  |
| CREBBP | CREB binding protein                                                                         | 1387   |

|        |                                                                                                     |        |
|--------|-----------------------------------------------------------------------------------------------------|--------|
| CRKL   | v-crk sarcoma virus CT10 oncogene homolog (avian)-like                                              | 1399   |
| CSF1   | colony stimulating factor 1                                                                         | 1435   |
| CSF1R  | colony stimulating factor 1 receptor                                                                | 1436   |
| CTCF   | CCCTC-binding factor (zinc finger protein)                                                          | 10664  |
| CTLA4  | cytotoxic T-lymphocyte-associated protein 4                                                         | 1493   |
| CTNNB1 | catenin (cadherin-associated protein), beta 1, 88kDa                                                | 1499   |
| CUL1   | cullin 1                                                                                            | 8454   |
| CUL4A  | cullin 4A                                                                                           | 8451   |
| CUL4B  | cullin 4B                                                                                           | 8450   |
| CUX1   | cut like homeobox 1                                                                                 | 1523   |
| DAXX   | death-domain associated protein                                                                     | 1616   |
| DCC    | deleted in colorectal carcinoma                                                                     | 1630   |
| DDR2   | discoidin domain receptor tyrosine kinase 2                                                         | 4921   |
| DDX11  | DEAD/H (Asp-Glu-Ala-Asp/His) box polypeptide 11 (CHL1-like helicase homolog, <i>S. cerevisiae</i> ) | 1663   |
| DEPDC5 | DEP domain containing 5                                                                             | 9681   |
| DICER1 | dicer 1, ribonuclease type III                                                                      | 23405  |
| DIS3   | DIS3 mitotic control homolog ( <i>S. cerevisiae</i> )                                               | 22894  |
| DKK1   | dickkopf homolog 1 ( <i>Xenopus laevis</i> )                                                        | 22943  |
| DLGAP2 | discs, large ( <i>Drosophila</i> ) homolog-associated protein 2                                     | 9228   |
| DNMT3A | DNA (cytosine-5-)-methyltransferase 3 alpha                                                         | 1788   |
| DOT1L  | DOT1-like, histone H3 methyltransferase ( <i>S. cerevisiae</i> )                                    | 84444  |
| DPF1   | D4, zinc and double PHD fingers family 1                                                            | 8193   |
| DPF2   | D4, zinc and double PHD fingers family 2                                                            | 5977   |
| DPF3   | D4, zinc and double PHD fingers, family 3                                                           | 8110   |
| DSG3   | desmoglein 3 (pemphigus vulgaris antigen)                                                           | 1830   |
| DTX2   | deltex homolog 2 ( <i>Drosophila</i> )                                                              | 113878 |
| DUSP4  | dual specificity phosphatase 4                                                                      | 1846   |
| EED    | embryonic ectoderm development                                                                      | 8726   |
| EGFR   | epidermal growth factor receptor (erythroblastic leukemia viral (v-erb-b) oncogene homolog, avian)  | 1956   |

|        |                                                                                                                |        |
|--------|----------------------------------------------------------------------------------------------------------------|--------|
| EIF1AX | eukaryotic translation initiation factor 1A, X-linked                                                          | 1964   |
| ELK3   | ELK3, ETS-domain protein (SRF accessory protein 2)                                                             | 2004   |
| ELMO1  | engulfment and cell motility 1                                                                                 | 9844   |
| EML4   | echinoderm microtubule associated protein like 4                                                               | 27436  |
| EMSY   | EMSY transcriptional repressor, BRCA2 interacting                                                              | 56946  |
| EP300  | E1A binding protein p300                                                                                       | 2033   |
| EPAS1  | endothelial PAS domain protein 1                                                                               | 2034   |
| EPHA2  | EPH receptor A2                                                                                                | 1969   |
| EPHA3  | EPH receptor A3                                                                                                | 2042   |
| EPHA6  | EPH receptor A6                                                                                                | 285220 |
| EPHA7  | EPH receptor A7                                                                                                | 2045   |
| ERBB2  | v-erb-b2 erythroblastic leukemia viral oncogene homolog 2, neuro/glioblastoma derived oncogene homolog (avian) | 2064   |
| ERBB3  | v-erb-b2 erythroblastic leukemia viral oncogene homolog 3 (avian)                                              | 2065   |
| ERBB4  | v-erb-a erythroblastic leukemia viral oncogene homolog 4 (avian)                                               | 2066   |
| ERG    | v-ets erythroblastosis virus E26 oncogene homolog (avian)                                                      | 2078   |
| ESR1   | estrogen receptor 1                                                                                            | 2099   |
| ESR2   | estrogen receptor 2 (ER beta)                                                                                  | 2100   |
| ETV1   | ets variant 1                                                                                                  | 2115   |
| ETV4   | ets variant 4                                                                                                  | 2118   |
| ETV5   | ets variant 5                                                                                                  | 2119   |
| ETV6   | ets variant 6                                                                                                  | 2120   |
| EWSR1  | similar to Ewing sarcoma breakpoint region 1; Ewing sarcoma breakpoint region 1                                | 2130   |
| EZH2   | enhancer of zeste homolog 2 (Drosophila)                                                                       | 2146   |
| FANCA  | Fanconi anemia, complementation group A                                                                        | 2175   |
| FANCC  | Fanconi anemia, complementation group C                                                                        | 2176   |
| FANCD2 | Fanconi anemia, complementation group D2                                                                       | 2177   |
| FANCE  | Fanconi anemia, complementation group E                                                                        | 2178   |
| FANCF  | Fanconi anemia, complementation group F                                                                        | 2188   |
| FANCG  | Fanconi anemia, complementation group G                                                                        | 2189   |

|       |                                                                                                          |        |
|-------|----------------------------------------------------------------------------------------------------------|--------|
| FANCI | Fanconi anemia, complementation group I                                                                  | 55215  |
| FANCL | Fanconi anemia, complementation group L                                                                  | 55120  |
| FANCM | Fanconi anemia, complementation group M                                                                  | 57697  |
| FAT1  | FAT tumor suppressor homolog 1 (Drosophila)                                                              | 2195   |
| FAT3  | FAT tumor suppressor homolog 3 (Drosophila)                                                              | 120114 |
| FBXW7 | F-box and WD repeat domain containing 7                                                                  | 55294  |
| FGF10 | fibroblast growth factor 10                                                                              | 2255   |
| FGF12 | fibroblast growth factor 12                                                                              | 2257   |
| FGF14 | fibroblast growth factor 14                                                                              | 2259   |
| FGF19 | fibroblast growth factor 19                                                                              | 9965   |
| FGF23 | fibroblast growth factor 23                                                                              | 8074   |
| FGF3  | fibroblast growth factor 3 (murine mammary tumor virus integration site (v-int-2) oncogene homolog)      | 2248   |
| FGF4  | fibroblast growth factor 4                                                                               | 2249   |
| FGF6  | fibroblast growth factor 6                                                                               | 2251   |
| FGF7  | fibroblast growth factor 7                                                                               | 2252   |
| FGFR1 | fibroblast growth factor receptor 1                                                                      | 2260   |
| FGFR2 | fibroblast growth factor receptor 2                                                                      | 2263   |
| FGFR3 | fibroblast growth factor receptor 3                                                                      | 2261   |
| FGFR4 | fibroblast growth factor receptor 4                                                                      | 2264   |
| FH    | fumarate hydratase                                                                                       | 2271   |
| FLG   | filaggrin                                                                                                | 2312   |
| FLG2  | filaggrin family member 2                                                                                | 388698 |
| FLI1  | Friend leukemia virus integration 1                                                                      | 2313   |
| FLRT3 | fibronectin leucine rich transmembrane protein 3                                                         | 23767  |
| FLT1  | fms-related tyrosine kinase 1 (vascular endothelial growth factor/vascular permeability factor receptor) | 2321   |
| FLT3  | fms-related tyrosine kinase 3                                                                            | 2322   |
| FLT4  | fms-related tyrosine kinase 4                                                                            | 2324   |
| FOXA1 | forkhead box A1                                                                                          | 3169   |
| FOXC1 | forkhead box C1                                                                                          | 2296   |
| FOXL2 | forkhead box L2                                                                                          | 668    |
| FOXM1 | forkhead box M1                                                                                          | 2305   |
| FOXP1 | forkhead box P1                                                                                          | 27086  |
| FRK   | fyn related Src family tyrosine kinase                                                                   | 2444   |



|          |                                                                                                                                                    |        |
|----------|----------------------------------------------------------------------------------------------------------------------------------------------------|--------|
| FRS2     | fibroblast growth factor receptor substrate 2                                                                                                      | 10818  |
| GAB2     | GRB2-associated binding protein 2                                                                                                                  | 9846   |
| GATA1    | GATA binding protein 1 (globin transcription factor 1)                                                                                             | 2623   |
| GATA3    | GATA binding protein 3                                                                                                                             | 2625   |
| GLI1     | GLI family zinc finger 1                                                                                                                           | 2735   |
| GMDS     | GDP-mannose 4,6-dehydratase                                                                                                                        | 2762   |
| GNA11    | guanine nucleotide binding protein (G protein), alpha 11 (Gq class)                                                                                | 2767   |
| GNAQ     | guanine nucleotide binding protein (G protein), q polypeptide                                                                                      | 2776   |
| GNAS     | GNAS complex locus                                                                                                                                 | 2778   |
| GPC6     | glypican 6                                                                                                                                         | 10082  |
| GPS2     | G protein pathway suppressor 2                                                                                                                     | 2874   |
| GRB2     | growth factor receptor-bound protein 2                                                                                                             | 2885   |
| GRIN2A   | glutamate receptor, ionotropic, N-methyl D-aspartate 2A                                                                                            | 2903   |
| GSK3B    | glycogen synthase kinase 3 beta                                                                                                                    | 2932   |
| GSTM1    | glutathione S-transferase mu 1                                                                                                                     | 2944   |
| GSTT1    | glutathione S-transferase theta 1                                                                                                                  | 2952   |
| H3F3A    | H3 histone, family 3B (H3.3B); H3 histone, family 3A pseudogene; H3 histone, family 3A; similar to H3 histone, family 3B; similar to histone H3.3B | 3020   |
| HAVCR2   | hepatitis A virus cellular receptor 2                                                                                                              | 84868  |
| HAX1     | HCLS1 associated protein X-1                                                                                                                       | 10456  |
| HDAC10   | histone deacetylase 10                                                                                                                             | 83933  |
| HGF      | hepatocyte growth factor (hepapoietin A; scatter factor)                                                                                           | 3082   |
| HIF1A    | hypoxia inducible factor 1 alpha subunit                                                                                                           | 3091   |
| HIST1H3B | histone cluster 1, H3b                                                                                                                             | 8358   |
| HLA-A    | major histocompatibility complex, class I, A                                                                                                       | 3105   |
| HLA-B    | major histocompatibility complex, class I, B                                                                                                       | 3106   |
| HLA-C    | major histocompatibility complex, class I, C                                                                                                       | 3107   |
| HNF4A    | hepatocyte nuclear factor 4 alpha                                                                                                                  | 3172   |
| HOXA13   | homeobox A13                                                                                                                                       | 3209   |
| HRAS     | v-Ha-ras Harvey rat sarcoma viral oncogene homolog                                                                                                 | 3265   |
| HRNR     | hornerin                                                                                                                                           | 388697 |

|          |                                                                                                                            |       |
|----------|----------------------------------------------------------------------------------------------------------------------------|-------|
| HSP90AA1 | heat shock protein 90kDa alpha (cytosolic), class A member 2; heat shock protein 90kDa alpha (cytosolic), class A member 1 | 3320  |
| HSP90AB1 | heat shock protein 90kDa alpha (cytosolic), class B member 1                                                               | 3326  |
| HSP90B1  | heat shock protein 90kDa beta (Grp94), member 1                                                                            | 7184  |
| IDH1     | isocitrate dehydrogenase 1 (NADP+), soluble                                                                                | 3417  |
| IDH2     | isocitrate dehydrogenase 2 (NADP+), mitochondrial                                                                          | 3418  |
| IGF1     | insulin-like growth factor 1 (somatomedin C)                                                                               | 3479  |
| IGF1R    | insulin-like growth factor 1 receptor                                                                                      | 3480  |
| IGF2     | insulin-like growth factor 2 (somatomedin A); insulin; INS-IGF2 readthrough transcript                                     | 3481  |
| IGF2R    | insulin-like growth factor 2 receptor                                                                                      | 3482  |
| IKBKE    | inhibitor of kappa light polypeptide gene enhancer in B-cells, kinase epsilon                                              | 9641  |
| IL7R     | interleukin 7 receptor                                                                                                     | 3575  |
| ING1     | inhibitor of growth family, member 1                                                                                       | 3621  |
| INPP4B   | inositol polyphosphate-4-phosphatase type II B                                                                             | 8821  |
| INSR     | insulin receptor                                                                                                           | 3643  |
| INTS4    | integrator complex subunit 4                                                                                               | 92105 |
| IRAK1    | interleukin-1 receptor-associated kinase 1                                                                                 | 3654  |
| IRF2     | interferon regulatory factor 2                                                                                             | 3660  |
| IRF2BP1  | interferon regulatory factor 2 binding protein 1                                                                           | 26145 |
| IRF4     | interferon regulatory factor 4                                                                                             | 3662  |
| IRS2     | insulin receptor substrate 2                                                                                               | 8660  |
| JAK1     | Janus kinase 1                                                                                                             | 3716  |
| JAK2     | Janus kinase 2                                                                                                             | 3717  |
| JAK3     | Janus kinase 3                                                                                                             | 3718  |
| JUN      | jun proto-oncogene                                                                                                         | 3725  |
| KAT6A    | K(lysine) acetyltransferase 6A                                                                                             | 7994  |
| KAT6B    | K(lysine) acetyltransferase 6B                                                                                             | 23522 |
| KDM1A    | lysine (K)-specific demethylase 1                                                                                          | 23028 |
| KDM2A    | lysine (K)-specific demethylase 2A                                                                                         | 22992 |
| KDM2B    | lysine (K)-specific demethylase 2B                                                                                         | 84678 |

|         |                                                                                                                                                                                                       |        |
|---------|-------------------------------------------------------------------------------------------------------------------------------------------------------------------------------------------------------|--------|
| KDM3B   | lysine (K)-specific demethylase 3B                                                                                                                                                                    | 51780  |
| KDM4A   | lysine (K)-specific demethylase 4A                                                                                                                                                                    | 9682   |
| KDM4B   | lysine (K)-specific demethylase 4B                                                                                                                                                                    | 23030  |
| KDM4C   | lysine (K)-specific demethylase 4C                                                                                                                                                                    | 23081  |
| KDM5A   | lysine (K)-specific demethylase 5A                                                                                                                                                                    | 5927   |
| KDM5C   | lysine (K)-specific demethylase 5C                                                                                                                                                                    | 8242   |
| KDM6A   | lysine (K)-specific demethylase 6A                                                                                                                                                                    | 7403   |
| KDR     | kinase insert domain receptor (a type III receptor tyrosine kinase)                                                                                                                                   | 3791   |
| KEAP1   | kelch-like ECH-associated protein 1                                                                                                                                                                   | 9817   |
| KIF5B   | kinesin family member 5B                                                                                                                                                                              | 3799   |
| KIT     | similar to Mast/stem cell growth factor receptor precursor (SCFR) (Proto-oncogene tyrosine-protein kinase Kit) (c-kit) (CD117 antigen); v-kit Hardy-Zuckerman 4 feline sarcoma viral oncogene homolog | 3815   |
| KLF4    | Kruppel-like factor 4 (gut)                                                                                                                                                                           | 9314   |
| KLHL6   | kelch-like 6 (Drosophila)                                                                                                                                                                             | 89857  |
| KMT2A   | myeloid/lymphoid or mixed-lineage leukemia (trithorax homolog, Drosophila)                                                                                                                            | 4297   |
| KMT2B   | myeloid/lymphoid or mixed-lineage leukemia 4                                                                                                                                                          | 9757   |
| KMT2C   | myeloid/lymphoid or mixed-lineage leukemia 3                                                                                                                                                          | 58508  |
| KMT2D   | myeloid/lymphoid or mixed-lineage leukemia 2                                                                                                                                                          | 8085   |
| KRAS    | v-Ki-ras2 Kirsten rat sarcoma viral oncogene homolog                                                                                                                                                  | 3845   |
| KYNU    | kynureninase (L-kynurenine hydrolase)                                                                                                                                                                 | 8942   |
| LAG3    | lymphocyte activating 3                                                                                                                                                                               | 3902   |
| LATS1   | LATS, large tumor suppressor, homolog 1 (Drosophila)                                                                                                                                                  | 9113   |
| LATS2   | LATS, large tumor suppressor, homolog 2 (Drosophila)                                                                                                                                                  | 26524  |
| LMO1    | LIM domain only 1 (rhombotin 1)                                                                                                                                                                       | 4004   |
| LONRF1  | LON peptidase N-terminal domain and ring finger 1                                                                                                                                                     | 91694  |
| LTK     | leukocyte receptor tyrosine kinase                                                                                                                                                                    | 4058   |
| MACROD2 | MACRO domain containing 2                                                                                                                                                                             | 140733 |
| MAP2K1  | mitogen-activated protein kinase kinase 1                                                                                                                                                             | 5604   |

|         |                                                                                                 |       |
|---------|-------------------------------------------------------------------------------------------------|-------|
| MAP2K2  | mitogen-activated protein kinase kinase 2 pseudogene; mitogen-activated protein kinase kinase 2 | 5605  |
| MAP2K4  | mitogen-activated protein kinase kinase 4                                                       | 6416  |
| MAP3K1  | mitogen-activated protein kinase kinase kinase 1                                                | 4214  |
| MAP3K13 | mitogen-activated protein kinase kinase kinase 13                                               | 9175  |
| MAP3K7  | mitogen-activated protein kinase kinase kinase 7                                                | 6885  |
| MAPK1   | mitogen-activated protein kinase 1                                                              | 5594  |
| MAPK3   | hypothetical LOC100271831; mitogen-activated protein kinase 3                                   | 5595  |
| MAPK7   | mitogen-activated protein kinase 7                                                              | 5598  |
| MAPKBP1 | mitogen-activated protein kinase binding protein 1                                              | 23005 |
| MAX     | MYC associated factor X                                                                         | 4149  |
| MCL1    | myeloid cell leukemia sequence 1 (BCL2-related)                                                 | 4170  |
| MDM2    | Mdm2 p53 binding protein homolog (mouse)                                                        | 4193  |
| MDM4    | Mdm4 p53 binding protein homolog (mouse)                                                        | 4194  |
| MECOM   | ecotropic viral integration site 1                                                              | 2122  |
| MED12   | mediator complex subunit 12                                                                     | 9968  |
| MELK    | maternal embryonic leucine zipper kinase                                                        | 9833  |
| MEN1    | multiple endocrine neoplasia I                                                                  | 4221  |
| MET     | met proto-oncogene (hepatocyte growth factor receptor)                                          | 4233  |
| MGMT    | O-6-methylguanine-DNA methyltransferase                                                         | 4255  |
| MITF    | microphthalmia-associated transcription factor                                                  | 4286  |
| MLH1    | mutL homolog 1, colon cancer, nonpolyposis type 2 (E. coli)                                     | 4292  |
| MLH3    | mutL homolog 3 (E. coli)                                                                        | 27030 |
| MOB1A   | MOB kinase activator 1A                                                                         | 55233 |
| MOB1B   | MOB kinase activator 1B                                                                         | 92597 |
| MORC1   | MORC family CW-type zinc finger 1                                                               | 27136 |
| MPL     | myeloproliferative leukemia virus oncogene                                                      | 4352  |
| MSH2    | mutS homolog 2, colon cancer, nonpolyposis type 1 (E. coli)                                     | 4436  |

|          |                                                                                                                                                                                       |        |
|----------|---------------------------------------------------------------------------------------------------------------------------------------------------------------------------------------|--------|
| MSH3     | mutS homolog 3 (E. coli)                                                                                                                                                              | 4437   |
| MSH6     | mutS homolog 6 (E. coli)                                                                                                                                                              | 2956   |
| MST1     | macrophage stimulating 1 (hepatocyte growth factor-like)                                                                                                                              | 4485   |
| MST1R    | macrophage stimulating 1 receptor (c-met-related tyrosine kinase)                                                                                                                     | 4486   |
| MTAP     | methylthioadenosine phosphorylase                                                                                                                                                     | 4507   |
| MTOR     | mechanistic target of rapamycin (serine/threonine kinase)                                                                                                                             | 2475   |
| MYB      | v-myb myeloblastosis viral oncogene homolog (avian)                                                                                                                                   | 4602   |
| MYC      | v-myc myelocytomatosis viral oncogene homolog (avian)                                                                                                                                 | 4609   |
| MYCL     | MYCL proto-oncogene, bHLH transcription factor                                                                                                                                        | 4610   |
| MYCN     | v-myc myelocytomatosis viral related oncogene, neuroblastoma derived (avian)                                                                                                          | 4613   |
| MYH9     | myosin, heavy chain 9, non-muscle                                                                                                                                                     | 4627   |
| NAALADL2 | N-acetylated alpha-linked acidic dipeptidase-like 2                                                                                                                                   | 254827 |
| NCOR1    | nuclear receptor co-repressor 1                                                                                                                                                       | 9611   |
| NEGR1    | neuronal growth regulator 1                                                                                                                                                           | 257194 |
| NF1      | neurofibromin 1                                                                                                                                                                       | 4763   |
| NF2      | neurofibromin 2 (merlin)                                                                                                                                                              | 4771   |
| NFE2L2   | nuclear factor (erythroid-derived 2)-like 2                                                                                                                                           | 4780   |
| NFKBIA   | nuclear factor of kappa light polypeptide gene enhancer in B-cells inhibitor, alpha                                                                                                   | 4792   |
| NKX2-1   | NK2 homeobox 1                                                                                                                                                                        | 7080   |
| NOTCH1   | Notch homolog 1, translocation-associated (Drosophila)                                                                                                                                | 4851   |
| NOTCH2   | Notch homolog 2 (Drosophila)                                                                                                                                                          | 4853   |
| NOTCH3   | Notch homolog 3 (Drosophila)                                                                                                                                                          | 4854   |
| NOTCH4   | Notch homolog 4 (Drosophila)                                                                                                                                                          | 4855   |
| NPM1     | nucleophosmin 1 (nucleolar phosphoprotein B23, numatrin) pseudogene 21; hypothetical LOC100131044; similar to nucleophosmin 1; nucleophosmin (nucleolar phosphoprotein B23, numatrin) | 4869   |
| NRAS     | neuroblastoma RAS viral (v-ras) oncogene homolog                                                                                                                                      | 4893   |

|          |                                                                                              |       |
|----------|----------------------------------------------------------------------------------------------|-------|
| NSD1     | nuclear receptor binding SET domain protein 1                                                | 64324 |
| NT5C2    | 5'-nucleotidase, cytosolic II                                                                | 22978 |
| NTNG1    | netrin G1                                                                                    | 22854 |
| NTRK1    | neurotrophic tyrosine kinase, receptor, type 1                                               | 4914  |
| NTRK2    | neurotrophic tyrosine kinase, receptor, type 2                                               | 4915  |
| NTRK3    | neurotrophic tyrosine kinase, receptor, type 3                                               | 4916  |
| PAF1     | Paf1, RNA polymerase II associated factor, homolog ( <i>S. cerevisiae</i> )                  | 54623 |
| PAK7     | p21 protein (Cdc42/Rac)-activated kinase 7                                                   | 57144 |
| PALB2    | partner and localizer of BRCA2                                                               | 79728 |
| PARD6G   | par-6 partitioning defective 6 homolog gamma ( <i>C. elegans</i> )                           | 84552 |
| PARK2    | Parkinson disease (autosomal recessive, juvenile) 2, parkin                                  | 5071  |
| PARP1    | poly (ADP-ribose) polymerase 1                                                               | 142   |
| PARP10   | poly (ADP-ribose) polymerase family, member 10                                               | 84875 |
| PARP2    | poly (ADP-ribose) polymerase 2                                                               | 10038 |
| PARP3    | poly (ADP-ribose) polymerase family, member 3                                                | 10039 |
| PARP4    | poly (ADP-ribose) polymerase family, member 4                                                | 143   |
| PAX3     | paired box 3                                                                                 | 5077  |
| PBRM1    | polybromo 1                                                                                  | 55193 |
| PCDH15   | protocadherin 15                                                                             | 65217 |
| PDCD1    | programmed cell death 1                                                                      | 5133  |
| PDCD1LG2 | programmed cell death 1 ligand 2                                                             | 80380 |
| PDE4D    | phosphodiesterase 4D, cAMP-specific (phosphodiesterase E3 dunce homolog, <i>Drosophila</i> ) | 5144  |
| PDGFRA   | platelet-derived growth factor receptor, alpha polypeptide                                   | 5156  |
| PDGFRB   | platelet-derived growth factor receptor, beta polypeptide                                    | 5159  |
| PDK1     | pyruvate dehydrogenase kinase, isozyme 1                                                     | 5163  |
| PDPK1    | 3-phosphoinositide dependent protein kinase-1                                                | 5170  |

|         |                                                               |        |
|---------|---------------------------------------------------------------|--------|
| PEA15   | phosphoprotein enriched in astrocytes 15                      | 8682   |
| PEG10   | paternally expressed 10                                       | 23089  |
| PGM5    | phosphoglucomutase 5                                          | 5239   |
| PHF10   | PHD finger protein 10                                         | 55274  |
| PHF12   | PHD finger protein 12                                         | 57649  |
| PHF6    | PHD finger protein 6                                          | 84295  |
| PHLPP2  | PH domain and leucine rich repeat protein phosphatase 2       | 23035  |
| PHOX2B  | paired-like homeobox 2b                                       | 8929   |
| PIK3C2G | phosphoinositide-3-kinase, class 2, gamma polypeptide         | 5288   |
| PIK3C3  | phosphoinositide-3-kinase, class 3                            | 5289   |
| PIK3CA  | phosphoinositide-3-kinase, catalytic, alpha polypeptide       | 5290   |
| PIK3CB  | phosphoinositide-3-kinase, catalytic, beta polypeptide        | 5291   |
| PIK3CG  | phosphoinositide-3-kinase, catalytic, gamma polypeptide       | 5294   |
| PIK3R1  | phosphoinositide-3-kinase, regulatory subunit 1 (alpha)       | 5295   |
| PIK3R2  | phosphoinositide-3-kinase, regulatory subunit 2 (beta)        | 5296   |
| PIK3R3  | phosphoinositide-3-kinase, regulatory subunit 3 (gamma)       | 8503   |
| PIK3R4  | phosphoinositide-3-kinase, regulatory subunit 4               | 30849  |
| PIK3R5  | phosphoinositide-3-kinase, regulatory subunit 5               | 23533  |
| PIK3R6  | phosphoinositide-3-kinase, regulatory subunit 6               | 146850 |
| PIM1    | pim-1 oncogene                                                | 5292   |
| PIM2    | pim-2 oncogene                                                | 11040  |
| PIM3    | pim-3 oncogene                                                | 415116 |
| PKHD1   | polycystic kidney and hepatic disease 1 (autosomal recessive) | 5314   |
| PLAT    | plasminogen activator, tissue                                 | 5327   |
| PLK2    | polo-like kinase 2 (Drosophila)                               | 10769  |
| PMS2    | PMS2 postmeiotic segregation increased 2 (S. cerevisiae)      | 5395   |
| POLD1   | polymerase (DNA directed), delta 1, catalytic subunit 125kDa  | 5424   |

|         |                                                                                                                       |       |
|---------|-----------------------------------------------------------------------------------------------------------------------|-------|
| POLE    | polymerase (DNA directed), epsilon                                                                                    | 5426  |
| PORCN   | porcupine homolog (Drosophila)                                                                                        | 64840 |
| PPARA   | peroxisome proliferator-activated receptor alpha                                                                      | 5465  |
| PPM1E   | protein phosphatase 1E (PP2C domain containing)                                                                       | 22843 |
| PPP1R3A | protein phosphatase 1, regulatory (inhibitor) subunit 3A                                                              | 5506  |
| PPP2R1A | protein phosphatase 2 (formerly 2A), regulatory subunit A, alpha isoform                                              | 5518  |
| PPP6C   | protein phosphatase 6, catalytic subunit                                                                              | 5537  |
| PRDM1   | PR domain containing 1, with ZNF domain                                                                               | 639   |
| PREX2   | phosphatidylinositol-3,4,5-trisphosphate-dependent Rac exchange factor 2                                              | 80243 |
| PRKAR1A | protein kinase, cAMP-dependent, regulatory, type I, alpha (tissue specific extinguisher 1)                            | 5573  |
| PRKCA   | protein kinase C, alpha                                                                                               | 5578  |
| PRKCB   | protein kinase C, beta                                                                                                | 5579  |
| PRKCG   | protein kinase C, gamma                                                                                               | 5582  |
| PRKDC   | similar to protein kinase, DNA-activated, catalytic polypeptide; protein kinase, DNA-activated, catalytic polypeptide | 5591  |
| PRLR    | prolactin receptor                                                                                                    | 5618  |
| PRMT5   | protein arginine methyltransferase 5                                                                                  | 10419 |
| PROZ    | protein Z, vitamin K-dependent plasma glycoprotein                                                                    | 8858  |
| PRRX1   | paired related homeobox 1                                                                                             | 5396  |
| PRSS1   | protease, serine, 1 (trypsin 1); trypsinogen C                                                                        | 5644  |
| PRX     | periaxin                                                                                                              | 57716 |
| PTCH1   | patched homolog 1 (Drosophila)                                                                                        | 5727  |
| PTCH2   | patched homolog 2 (Drosophila)                                                                                        | 8643  |
| PTEN    | phosphatase and tensin homolog; phosphatase and tensin homolog pseudogene 1                                           | 5728  |
| PTP4A1  | protein tyrosine phosphatase type IVA, member 1                                                                       | 7803  |
| PTPN11  | protein tyrosine phosphatase, non-receptor type 11; similar to protein tyrosine phosphatase, non-receptor type 11     | 5781  |



|         |                                                                                         |        |
|---------|-----------------------------------------------------------------------------------------|--------|
| PTPN22  | protein tyrosine phosphatase, non-receptor type 22 (lymphoid)                           | 26191  |
| PTPRD   | protein tyrosine phosphatase, receptor type, D                                          | 5789   |
| PTPRN2  | protein tyrosine phosphatase, receptor type, N polypeptide 2                            | 5799   |
| RABGEF1 | RAB guanine nucleotide exchange factor (GEF) 1                                          | 27342  |
| RAC1    | ras-related C3 botulinum toxin substrate 1 (rho family, small GTP binding protein Rac1) | 5879   |
| RAD21   | RAD21 homolog ( <i>S. pombe</i> )                                                       | 5885   |
| RAD50   | RAD50 homolog ( <i>S. cerevisiae</i> )                                                  | 10111  |
| RAD51   | RAD51 homolog (RecA homolog, <i>E. coli</i> ) ( <i>S. cerevisiae</i> )                  | 5888   |
| RAD51B  | RAD51 paralog B                                                                         | 5890   |
| RAD51C  | RAD51 homolog C ( <i>S. cerevisiae</i> )                                                | 5889   |
| RAD51D  | RAD51 paralog D                                                                         | 5892   |
| RAD52   | RAD52 homolog ( <i>S. cerevisiae</i> )                                                  | 5893   |
| RAF1    | v-raf-1 murine leukemia viral oncogene homolog 1                                        | 5894   |
| RALA    | RAS like proto-oncogene A                                                               | 5898   |
| RALB    | RAS like proto-oncogene B                                                               | 5899   |
| RB1     | retinoblastoma 1                                                                        | 5925   |
| RBFOX1  | RNA binding protein, fox-1 homolog ( <i>C. elegans</i> ) 1                              | 54715  |
| RBM10   | RNA binding motif protein 10                                                            | 8241   |
| REG4    | regenerating islet-derived family, member 4                                             | 83998  |
| REL     | v-rel reticuloendotheliosis viral oncogene homolog (avian)                              | 5966   |
| RET     | ret proto-oncogene                                                                      | 5979   |
| RHEB    | Ras homolog enriched in brain                                                           | 6009   |
| RHOA    | ras homolog family member A                                                             | 387    |
| RICTOR  | RPTOR independent companion of MTOR, complex 2                                          | 253260 |
| RIOK3   | RIO kinase 3 (yeast)                                                                    | 8780   |
| RIT1    | Ras like without CAAX 1                                                                 | 6016   |
| RNF19A  | ring finger protein 19A                                                                 | 25897  |
| RNF32   | ring finger protein 32                                                                  | 140545 |
| RNF43   | ring finger protein 43                                                                  | 54894  |

|         |                                                                                                   |        |
|---------|---------------------------------------------------------------------------------------------------|--------|
| ROBO1   | roundabout, axon guidance receptor, homolog 1 (Drosophila); similar to roundabout 1 isoform b     | 6091   |
| ROBO2   | roundabout, axon guidance receptor, homolog 2 (Drosophila)                                        | 6092   |
| ROS1    | c-ros oncogene 1 , receptor tyrosine kinase                                                       | 6098   |
| RPS6KA5 | ribosomal protein S6 kinase, 90kDa, polypeptide 5                                                 | 9252   |
| RPS6KB1 | ribosomal protein S6 kinase, 70kDa, polypeptide 1                                                 | 6198   |
| RPS6KC1 | ribosomal protein S6 kinase, 52kDa, polypeptide 1                                                 | 26750  |
| RPTN    | repetin                                                                                           | 126638 |
| RPTOR   | regulatory associated protein of MTOR, complex 1                                                  | 57521  |
| RSPO1   | R-spondin homolog (Xenopus laevis)                                                                | 284654 |
| RSPO2   | R-spondin 2 homolog (Xenopus laevis)                                                              | 340419 |
| RSPO3   | R-spondin 3 homolog (Xenopus laevis)                                                              | 84870  |
| RSPO4   | R-spondin family, member 4                                                                        | 343637 |
| RUNX1   | runt-related transcription factor 1                                                               | 861    |
| SAV1    | salvador homolog 1 (Drosophila)                                                                   | 60485  |
| SDK1    | sidekick homolog 1, cell adhesion molecule (chicken); hypothetical LOC730351                      | 221935 |
| SELL    | selectin L                                                                                        | 6402   |
| SETD2   | SET domain containing 2                                                                           | 29072  |
| SF3B1   | splicing factor 3b, subunit 1, 155kDa                                                             | 23451  |
| SFRP1   | secreted frizzled-related protein 1                                                               | 6422   |
| SGK1    | serum/glucocorticoid regulated kinase 1                                                           | 6446   |
| SH2B3   | SH2B adaptor protein 3                                                                            | 10019  |
| SIM1    | single-minded homolog 1 (Drosophila)                                                              | 6492   |
| SKP2    | S-phase kinase associated protein 2                                                               | 6502   |
| SLIT2   | slit homolog 2 (Drosophila)                                                                       | 9353   |
| SMAD2   | SMAD family member 2                                                                              | 4087   |
| SMAD3   | SMAD family member 3                                                                              | 4088   |
| SMAD4   | SMAD family member 4                                                                              | 4089   |
| SMARCA1 | SWI/SNF related, matrix associated, actin dependent regulator of chromatin, subfamily a, member 1 | 6594   |

|          |                                                                                                                 |        |
|----------|-----------------------------------------------------------------------------------------------------------------|--------|
| SMARCA2  | SWI/SNF related, matrix associated, actin dependent regulator of chromatin, subfamily a, member 2               | 6595   |
| SMARCA4  | SWI/SNF related, matrix associated, actin dependent regulator of chromatin, subfamily a, member 4               | 6597   |
| SMARCA5  | SWI/SNF related, matrix associated, actin dependent regulator of chromatin, subfamily a, member 5               | 8467   |
| SMARCAD1 | SWI/SNF-related, matrix-associated actin-dependent regulator of chromatin, subfamily a, containing DEAD/H box 1 | 56916  |
| SMARCAL1 | SWI/SNF related, matrix associated, actin dependent regulator of chromatin, subfamily a-like 1                  | 50485  |
| SMARCB1  | SWI/SNF related, matrix associated, actin dependent regulator of chromatin, subfamily b, member 1               | 6598   |
| SMARCC1  | SWI/SNF related, matrix associated, actin dependent regulator of chromatin, subfamily c, member 1               | 6599   |
| SMARCC2  | SWI/SNF related, matrix associated, actin dependent regulator of chromatin, subfamily c, member 2               | 6601   |
| SMARCD1  | SWI/SNF related, matrix associated, actin dependent regulator of chromatin, subfamily d, member 1               | 6602   |
| SMARCD2  | SWI/SNF related, matrix associated, actin dependent regulator of chromatin, subfamily d, member 2               | 6603   |
| SMARCD3  | SWI/SNF related, matrix associated, actin dependent regulator of chromatin, subfamily d, member 3               | 6604   |
| SMARCE1  | SWI/SNF related, matrix associated, actin dependent regulator of chromatin, subfamily e, member 1               | 6605   |
| SMO      | smoothened homolog ( <i>Drosophila</i> )                                                                        | 6608   |
| SNTG2    | syntrophin, gamma 2                                                                                             | 54221  |
| SNX31    | sorting nexin 31                                                                                                | 169166 |
| SOX17    | SRY (sex determining region Y)-box 17                                                                           | 64321  |

|         |                                                                                  |        |
|---------|----------------------------------------------------------------------------------|--------|
| SOX2    | SRY (sex determining region Y)-box 2                                             | 6657   |
| SOX9    | SRY-box 9                                                                        | 6662   |
| SPEN    | spen homolog, transcriptional regulator (Drosophila)                             | 23013  |
| SPOP    | speckle-type POZ protein                                                         | 8405   |
| SPRY1   | sprouty homolog 1, antagonist of FGF signaling (Drosophila)                      | 10252  |
| SPRY2   | sprouty homolog 2 (Drosophila)                                                   | 10253  |
| SPRY3   | sprouty homolog 3 (Drosophila)                                                   | 10251  |
| SPRY4   | sprouty homolog 4 (Drosophila)                                                   | 81848  |
| SS18    | synovial sarcoma translocation, chromosome 18                                    | 6760   |
| STAG2   | stromal antigen 2                                                                | 10735  |
| STAT3   | signal transducer and activator of transcription 3 (acute-phase response factor) | 6774   |
| STK11   | serine/threonine kinase 11                                                       | 6794   |
| STK19   | serine/threonine kinase 19                                                       | 8859   |
| STK3    | serine/threonine kinase 3 (STE20 homolog, yeast)                                 | 6788   |
| STRADA  | STE20-related kinase adaptor alpha                                               | 92335  |
| STXBP5L | syntaxin binding protein 5-like                                                  | 9515   |
| SUFU    | suppressor of fused homolog (Drosophila)                                         | 51684  |
| TAB3    | mitogen-activated protein kinase kinase kinase 7 interacting protein 3           | 257397 |
| TACC1   | transforming, acidic coiled-coil containing protein 1                            | 6867   |
| TACC3   | transforming, acidic coiled-coil containing protein 3                            | 10460  |
| TBC1D7  | TBC1 domain family, member 7                                                     | 51256  |
| TBX3    | T-box 3                                                                          | 6926   |
| TCF7    | transcription factor 7 (T-cell specific, HMG-box)                                | 6932   |
| TCF7L1  | transcription factor 7-like 1 (T-cell specific, HMG-box)                         | 83439  |
| TCF7L2  | transcription factor 7-like 2 (T-cell specific, HMG-box)                         | 6934   |
| TEAD4   | TEA domain transcription factor 4                                                | 7004   |
| TERT    | telomerase reverse transcriptase                                                 | 7015   |
| TET2    | tet oncogene family member 2                                                     | 54790  |

|         |                                                                     |           |
|---------|---------------------------------------------------------------------|-----------|
| TEX15   | testis expressed 15                                                 | 56154     |
| TGFBR2  | transforming growth factor, beta receptor II (70/80kDa)             | 7048      |
| TLR3    | toll-like receptor 3                                                | 7098      |
| TMEM173 | transmembrane protein 173                                           | 340061    |
| TMPRSS2 | transmembrane protease, serine 2                                    | 7113      |
| TNFSF10 | tumor necrosis factor (ligand) superfamily, member 10               | 8743      |
| TNKS    | tankyrase, TRF1-interacting ankyrin-related ADP-ribose polymerase   | 8658      |
| TNKS2   | tankyrase, TRF1-interacting ankyrin-related ADP-ribose polymerase 2 | 80351     |
| TOP1    | topoisomerase (DNA) I                                               | 7150      |
| TP53    | tumor protein p53                                                   | 7157      |
| TP63    | tumor protein p63                                                   | 8626      |
| TP73    | tumor protein p73                                                   | 7161      |
| TPK1    | thiamin pyrophosphokinase 1                                         | 27010     |
| TPR     | translocated promoter region (to activated MET oncogene)            | 7175      |
| TRAF2   | TNF receptor-associated factor 2                                    | 7186      |
| TRAF3   | TNF receptor-associated factor 3                                    | 7187      |
| TRAF7   | TNF receptor-associated factor 7                                    | 84231     |
| TRRAP   | transformation/transcription domain-associated protein              | 8295      |
| TSC1    | tuberous sclerosis 1                                                | 7248      |
| TSC2    | tuberous sclerosis 2                                                | 7249      |
| TSHR    | thyroid stimulating hormone receptor                                | 7253      |
| TSTD1   | thiosulfate sulfurtransferase KAT, putative                         | 100131187 |
| TTK     | TTK protein kinase                                                  | 7272      |
| TUBD1   | tubulin, delta 1                                                    | 51174     |
| U2AF1   | U2 small nuclear RNA auxiliary factor 1                             | 7307      |
| VEGFA   | vascular endothelial growth factor A                                | 7422      |
| VHL     | von Hippel-Lindau tumor suppressor                                  | 7428      |
| VPREB1  | pre-B lymphocyte 1                                                  | 7441      |
| WDFY4   | WDFY family member 4                                                | 57705     |
| WDR5    | WD repeat domain 5                                                  | 11091     |
| WHSC1   | Wolf-Hirschhorn syndrome candidate 1                                | 7468      |
| WHSC1L1 | Wolf-Hirschhorn syndrome candidate 1-like 1                         | 54904     |
| WRN     | Werner syndrome RecQ like helicase                                  | 7486      |

|        |                                      |        |
|--------|--------------------------------------|--------|
| WSB1   | WD repeat and SOCS box-containing 1  | 26118  |
| WT1    | Wilms tumor 1                        | 7490   |
| WWOX   | WW domain containing oxidoreductase  | 51741  |
| YAF2   | YY1 associated factor 2              | 10138  |
| YAP1   | Yes-associated protein 1, 65kDa      | 10413  |
| ZC3H13 | zinc finger CCCH-type containing 13  | 23091  |
| ZEB2   | zinc finger E-box binding homeobox 2 | 9839   |
| ZNF132 | zinc finger protein 132              | 7691   |
| ZNF217 | zinc finger protein 217              | 7764   |
| ZNF324 | zinc finger protein 324              | 25799  |
| ZNF639 | zinc finger protein 639              | 51193  |
| ZNF703 | zinc finger protein 703              | 80139  |
| ZNF704 | zinc finger protein 704              | 619279 |
| ZNF704 | zinc finger protein 704              | 619279 |

Supplementary Table 3: Selected introns

| <b>Gene Symbol</b> | <b>Gene Description</b>                                 | <b>Entrez Gene ID</b> |
|--------------------|---------------------------------------------------------|-----------------------|
| ALK                | anaplastic lymphoma receptor tyrosine kinase            | 238                   |
| BRAF               | B-Raf proto-oncogene, serine/threonine kinase           | 673                   |
| BRD4               | bromodomain containing 4                                | 23476                 |
| CTNNB1             | catenin (cadherin-associated protein), beta 1, 88kDa    | 1499                  |
| EGFR               | epidermal growth factor receptor                        | 1956                  |
| EGFR               | epidermal growth factor receptor                        | 1956                  |
| ELK4               | ELK4, ETS-domain protein (SRF accessory protein 1)      | 2005                  |
| EML4               | echinoderm microtubule associated protein like 4        | 27436                 |
| ERG                | v-ets avian erythroblastosis virus E26 oncogene homolog | 2078                  |
| ETV1               | ets variant 1                                           | 2115                  |
| ETV4               | ets variant 4                                           | 2118                  |
| ETV6               | ets variant 6                                           | 2120                  |
| EWSR1              | EWS RNA-binding protein 1                               | 2130                  |
| FGFR1              | fibroblast growth factor receptor 1                     | 2260                  |
| FGFR2              | fibroblast growth factor receptor 2                     | 2263                  |
| FGFR3              | fibroblast growth factor receptor 3                     | 2261                  |
| FGFR4              | fibroblast growth factor receptor 4                     | 2264                  |
| MET                | MET proto-oncogene, receptor tyrosine kinase            | 4233                  |
| NOTCH1             | notch 1                                                 | 4851                  |
| NTRK1              | neurotrophic tyrosine kinase, receptor, type 1          | 4914                  |
| PAX3               | paired box 3                                            | 5077                  |
| RAF1               | Raf-1 proto-oncogene, serine/threonine kinase           | 5894                  |
| RET                | ret proto-oncogene                                      | 5979                  |
| ROS1               | ROS proto-oncogene 1 , receptor tyrosine kinase         | 6098                  |
| RSPO2              | R-spondin 2                                             | 340419                |
| RSPO3              | R-spondin 3                                             | 84870                 |
| SUZ12              | SUZ12 polycomb repressive complex 2 subunit             | 23512                 |
| TFE3               | transcription factor binding to IGHM enhancer 3         | 7030                  |

|         |                                                        |        |
|---------|--------------------------------------------------------|--------|
| TMPRSS2 | transmembrane protease, serine 2                       | 7113   |
| VTI1A   | vesicle transport through interaction with t-SNAREs 1A | 143187 |



Supplementary Table 4:

| <b>Specimen Type</b> | <b>Case 1</b> | <b>Case 2</b> | <b>Case 3</b> | <b>Case 4</b> | <b>Case 5</b> | <b>Case 6</b> | <b>Case 7</b> | <b>Case 8</b> | <b>Case 9</b> |
|----------------------|---------------|---------------|---------------|---------------|---------------|---------------|---------------|---------------|---------------|
| Normal               | X             | X             | X             | X             | X             | X             | X             | X             | X             |
| Tumor                | X             | -             | X             | X             | -             | X             | X             | X             | X             |
| Paired Non-tumor     | X             | -             | X             | X             | -             | X             | X             | X             | X             |
| Blood                | X             | X             | X             | X             | X             | -             |               | X             | X             |
| Pleural Effusion     | -             | X             | X             | -             | -             | -             | X             | -             | X             |
| Pericardial fluid    | -             | -             | -             | X             | -             | -             | -             | -             | -             |

Supplementary Table 5. Summary of numbers of samples with tumor after evaluation of hematoxylin and eosin slides from formalin-fixed paraffin embedded blocks. “Primary lung” samples were collected from the first site diagnosed with lung cancer and “secondary lung” samples were collected from any later sites separated from the primary site that were identified with cancer.

| Tumor Site            | Number of Samples with Tumor Confirmed Microscopically |          |          |          |          |          |          |          |          | Total     |
|-----------------------|--------------------------------------------------------|----------|----------|----------|----------|----------|----------|----------|----------|-----------|
|                       | Case 1                                                 | Case 2   | Case 3   | Case 4   | Case 5   | Case 6   | Case 7   | Case 8   | Case 9   |           |
| <b>Primary Lung</b>   | 1                                                      | 0        | 1        | 1        | 0        | 1        | 1        | 1        | 1        | <b>7</b>  |
| <b>Secondary Lung</b> | 1                                                      | 0        | 2        | 1        | 0        | 0        | 0        | 3        | 1        | <b>8</b>  |
| <b>Pericardium</b>    | 0                                                      | 0        | 0        | 0        | 0        | 0        | 2        | 0        | 0        | <b>2</b>  |
| <b>Liver</b>          | 1                                                      | 0        | 0        | 1        | 0        | 0        | 0        | 0        | 4        | <b>6</b>  |
| <b>Kidney</b>         | 2                                                      | 0        | 0        | 0        | 0        | 0        | 0        | 0        | 0        | <b>2</b>  |
| <b>Lymph Nodes</b>    | 2                                                      | 0        | 0        | 1        | 0        | 1        | 1        | 1        | 0        | <b>6</b>  |
| <b>Adrenal Gland</b>  | 1                                                      | 0        | 0        | 1        | 0        | 0        | 0        | 1        | 0        | <b>3</b>  |
| <b>Bone</b>           | 0                                                      | 0        | 0        | 0        | 0        | 0        | 0        | 3        | 0        | <b>3</b>  |
| <b>Total</b>          | <b>8</b>                                               | <b>0</b> | <b>3</b> | <b>5</b> | <b>0</b> | <b>2</b> | <b>4</b> | <b>9</b> | <b>6</b> | <b>37</b> |

Supplementary Table 6:

| Study ID | Anatomic Location      | Protocol | Estimated Mean |                 | PCT            |              |                                 | Oncogene | Estimated Library Size (millions) | PCT Coding | PCT Duplication |
|----------|------------------------|----------|----------------|-----------------|----------------|--------------|---------------------------------|----------|-----------------------------------|------------|-----------------|
|          |                        |          | Purity         | Target Coverage | Selected Bases | # coding SNV | # unique SNV                    |          |                                   |            |                 |
| 1        | Left Lung              | DNA      | 0.16           | 481.4           | 87.3%          | 14           | 1 KRAS G12V 14%                 |          |                                   |            |                 |
| 1        | Liver                  | DNA      | 0.29           | 481.3           | 87.0%          | 20           | 0 KRAS G12V 51%                 |          |                                   |            |                 |
| 1        | Mediastinal Lymph Node | DNA      | 0.2            | 448.7           | 87.6%          | 21           | 1 KRAS G12V 19%                 |          |                                   |            |                 |
| 1        | Right Lung             | DNA      | 0.24           | 609.3           | 89.3%          | 21           | 1 KRAS G12V 41%                 |          |                                   |            |                 |
| 3        | Lung Right Lower Lobe  | DNA      | 0.55           | 547.4           | 88.7%          | 12           | 1 KRAS G12V 55%                 |          |                                   |            |                 |
| 3        | Lung Right Upper Lobe  | DNA      | 0.73           | 731.6           | 84.6%          | 14           | 2 KRAS G12V 49%                 |          |                                   |            |                 |
| 4        | Liver                  | DNA      | 0.55           | 554.8           | 88.0%          | 15           | KEAP1 E441* 45%, TP53 N239D 41% |          |                                   |            |                 |
| 4        | Pericardial Lymph Node | DNA      | 0.66           | 528.8           | 87.0%          | 13           | 0 TP53 N239D 79%                |          |                                   |            |                 |
| 4        | Right Lung             | DNA      | 0.8            | 472.4           | 86.1%          | 16           | KEAP1 E441* 87%, TP53 N239D 80% |          |                                   |            |                 |
| 6        | Lung Left Lower Lobe   | DNA      | 0.17           | 537.9           | 88.6%          | 7            | BRCA2 R2034C 50%, KRAS G12D 3%  |          |                                   |            |                 |
| 6        | Lymph Node             | DNA      | 0.16           | 632.2           | 87.5%          | 20           | BRCA2 R2034C 44%, KRAS G12D 10% |          |                                   |            |                 |
| 7        | Lung Left Hilar Region | DNA      | 0.3            | 817.2           | 89.0%          | 10           | SMARCA4 R1135Q 13%              |          |                                   |            |                 |
| 7        | Mediastinal Lymph Node | DNA      | 0.16           | 638.0           | 88.7%          | 9            | 0 SMARCA4 R1135Q 6%             |          |                                   |            |                 |
| 1        | Left Lung              | RNA      |                |                 |                |              |                                 | 210.64   | 13.9%                             | 9%         |                 |
| 1        | Liver                  | RNA      |                |                 |                |              |                                 | 88.30    | 16.7%                             | 15%        |                 |
| 1        | Mediastinal Lymph Node | RNA      |                |                 |                |              |                                 | 29.38    | 13.6%                             | 31%        |                 |
| 1        | Right Lung             | RNA      |                |                 |                |              |                                 | 82.13    | 15.4%                             | 16%        |                 |
| 3        | Lung Right Lower Lobe  | RNA      |                |                 |                |              |                                 | 216.29   | 14.5%                             | 9%         |                 |
| 3        | Lung Right Upper Lobe  | RNA      |                |                 |                |              |                                 | 125.94   | 13.8%                             | 12%        |                 |
| 4        | Liver                  | RNA      |                |                 |                |              |                                 | 147.56   | 18.1%                             | 12%        |                 |
| 4        | Pericardial Lymph Node | RNA      |                |                 |                |              |                                 | 89.58    | 11.6%                             | 15%        |                 |
| 4        | Right Lung             | RNA      |                |                 |                |              |                                 | 15.07    | 11.7%                             | 49%        |                 |
| 6        | Lung Left Lower Lobe   | RNA      |                |                 |                |              |                                 | 286.98   | 16.1%                             | 8%         |                 |
| 6        | Lymph Node             | RNA      |                |                 |                |              |                                 | 186.74   | 17.0%                             | 11%        |                 |
| 7        | Lung Left Hilar Region | RNA      |                |                 |                |              |                                 | 249.41   | 19.3%                             | 9%         |                 |
| 7        | Mediastinal Lymph Node | RNA      |                |                 |                |              |                                 | 34.51    | 17.9%                             | 28%        |                 |

Supplementary table 7:

| Participant 1 | Gene Symbol       | Amino Acid Change | Lung Left             | Lung Right              | Mediastinal Lymph Node | Liver       |
|---------------|-------------------|-------------------|-----------------------|-------------------------|------------------------|-------------|
|               | PDCD1             | F63V              | 0.037656904           | 0.067615658             | 0.072916667            | 0.156164384 |
|               | EPHA6             | P1052Q            | 0.072929543           | 0.139393939             | 0.119422572            | 0.219736842 |
|               | SMARCA5           | D151Y             | 0.058295964           | 0.217228464             | 0.094562648            | 0.341708543 |
|               | FAT1              | G1707S            | 0.054363376           | 0.196078431             | 0.122866894            | 0.305555556 |
|               | JAK2              | K558N             | 0.472380952           | 0.546052632             | 0.45561139             | 0.480662983 |
|               | ATM               | R2832L            | 0.058823529           | 0.087096774             | 0.0625                 | 0.032840722 |
|               | KRAS              | G12V              | 0.13553719            | 0.405870445             | 0.192125984            | 0.513872135 |
|               | PARP4             | V1111M            | 0.054325956           | 0.061749571             | 0.065263158            | 0.053452116 |
|               | PIF1              | V172M             | 0.494163424           | 0.475570033             | 0.502347418            | 0.474777448 |
|               | PRKCB             | P643T             | 0.052991453           | 0.126631854             | 0.092391304            | 0.263461538 |
|               | TP53              | K132N             | 0.049180328           | 0.237442922             | 0.12                   | 0.304545455 |
|               | CDK12             | E281D             | 0.070093458           | 0.099667774             | 0.07254902             | 0.171875    |
|               | EIF1AX            | G6V, Splice site  | 0.054320988           | 0.084775087             | 0.074235808            | 0.059090909 |
|               | ARID1B            | A852V             | 0.03962704            |                         |                        |             |
|               | TPRD              | Splice site       |                       | 0.064516129             | 0.076246334            | 0.274052478 |
|               | ATOH7             | H115D             |                       | 0.221052632             | 0.079646018            | 0.290697674 |
|               | FAT3              | D2950Y            |                       | 0.125944584             | 0.088679245            | 0.20625     |
|               | BCOR              | C94G              |                       | 0.164179104             | 0.079295154            | 0.191428571 |
|               | ARAF              | E354K             |                       | 0.144144144             | 0.115789474            | 0.215189873 |
| ATRX          | K1429N            |                   | 0.131406045           | 0.059504132             | 0.203767123            |             |
| STXBP5L       | R789*             |                   |                       | 0.1015625               |                        |             |
| Participant 3 | Gene Symbol       | Amino Acid Change | Lung Right Lower Lobe | Lung Right Upper Lobe   |                        |             |
|               | STK11             | G268 frameshift   | 0.82175926            | 0.8742515               |                        |             |
|               | TET2              | P1723S            | 0.57495591            | 0.41356383              |                        |             |
|               | KRAS              | G12V              | 0.55459459            | 0.48764259              |                        |             |
|               | BRCA1             | S1165*            | 0.53673724            | 0.59250399              |                        |             |
|               | PCDH15            | R275C             | 0.51031637            | 0.48028311              |                        |             |
|               | FOXC1             | A493V             | 0.50655022            | 0.61971831              |                        |             |
|               | DZIP1             | G112V             | 0.47407407            | 0.43373494              |                        |             |
|               | GRIN2A            | V187F             | 0.44736842            | 0.39798489              |                        |             |
|               | ERBB3             | T478S             | 0.43067847            | 0.43783784              |                        |             |
|               | PIK3CA            | R662M             | 0.37818182            | 0.39713542              |                        |             |
|               | DCC               | G276C             | 0.36726547            | 0.2729927               |                        |             |
|               | ZNF324            | G525 frameshift   | 0.22527473            | 0.36190476              |                        |             |
|               | NTRK3             | R694T             | 0.02571429            | 0.1847619               |                        |             |
|               | MECOM             | G610W             | 0.15069968            |                         |                        |             |
|               | MECOM             | G610E frameshift  | 0.14412636            |                         |                        |             |
| FBXW7         | Splice site indel | 0.06849315        |                       |                         |                        |             |
| NOTCH4        | Splice site       |                   | 0.14338235            |                         |                        |             |
| PIK3R4        | Splice site indel |                   | 0.05128205            |                         |                        |             |
| STAG2         | Splice site indel |                   | 0.06896552            |                         |                        |             |
| Participant 4 | Gene Symbol       | Amino Acid Change | Lung Right            | Pericardinal Lymph Node | Liver                  |             |
|               | RB1               | Y805 frameshift   | 0.856115108           | 0.717285945             | 0.355430183            |             |
|               | SMARCA4           | R973L             | 0.805555556           | 0.720496894             | 0.48                   |             |
|               | MSH3              | P231S             | 0.803921569           | 0.778350515             | 0.302120141            |             |
|               | TP53              | N239D             | 0.801104972           | 0.786458333             | 0.412765957            |             |
|               | NTRK3             | I321N             | 0.777777778           | 0.701754386             | 0.438016529            |             |
|               | FGF4              | Y146*             | 0.606382979           | 0.509259259             | 0.542553191            |             |
|               | RBM10             | P388S             | 0.47706422            | 0.552995392             | 0.497560976            |             |
|               | AR                | E255Q             | 0.473684211           | 0.447674419             | 0.2109375              |             |
|               | PRSS1             | G143V             | 0.443946188           | 0.393305439             | 0.287037037            |             |
|               | SF3B1             | Y412C             | 0.442913386           | 0.40173913              | 0.227474151            |             |
|               | KDM5C             | D1430E            | 0.427230047           | 0.408376963             | 0.224043716            |             |
|               | AVPR1A            | A273S             | 0.364963504           | 0.411027569             | 0.250554324            |             |
|               | PAR6G             | L360V             | 0.299435028           | 0.338461538             | 0.377906977            |             |
|               | AFF2              | L199V             | 0.466284075           | 0.329896907             |                        |             |
|               | KEAP1             | E441*             | 0.867647059           |                         | 0.446153846            |             |
|               | PPP1R3A           | L589F             |                       |                         | 0.036637931            |             |
| PCSK5         | A1451D            |                   |                       | 0.16909621              |                        |             |
| ATRX          | T785I             | 0.139851485       |                       |                         |                        |             |

|  | Participant 6 |  | Gene Symbol | Amino Acid Change | Lung Left Lower Lobe   | Lymph Node             |
|--|---------------|--|-------------|-------------------|------------------------|------------------------|
|  |               |  |             | BRCA2             | R2034C                 | 0.498618785            |
|  |               |  | PDK1        | M289I             | 0.458823529            | 0.488745981            |
|  |               |  | NTRK1       | L316R             | 0.052427184            | 0.135061392            |
|  |               |  | KRAS        | R123G             | 0.032                  | 0.128550075            |
|  |               |  | KRAS        | G12D              | 0.035117057            | 0.103040541            |
|  |               |  | PTPRD       | A631S             | 0.028776978            | 0.063829787            |
|  |               |  | EPHA3       | D144V             |                        | 0.065194532            |
|  |               |  | MECOM       | NS                |                        | 0.062972292            |
|  |               |  | MECOM       | NS                |                        | 0.062972292            |
|  |               |  | FLT4        | G541C             |                        | 0.111111111            |
|  |               |  | PHF3        | E763*             |                        | 0.080931264            |
|  |               |  | HGF         | T48N              |                        | 0.071535022            |
|  |               |  | TRRAP       | S1503A            |                        | 0.096                  |
|  |               |  | DLGAP2      | L891H             |                        | 0.057803468            |
|  |               |  | PTPRD       | V687L             |                        | 0.091286307            |
|  |               |  | KLF4        | A67S              |                        | 0.089285714            |
|  |               |  | TCF7L2      | D181A             |                        | 0.072727273            |
|  |               |  | FAT3        | V586D             |                        | 0.098258706            |
|  |               |  | FAT3        | Q3198H            |                        | 0.057352941            |
|  |               |  | FLT1        | *734L             |                        | 0.055984556            |
|  |               |  | RBM10       | E605*             |                        | 0.170616114            |
|  |               |  | FBXW7       | Splice site indel |                        |                        |
|  | Participant 7 |  | Gene Symbol | Amino Acid Change | Lung Left Hilar Region | Mediastinal Lymph Node |
|  |               |  |             |                   |                        |                        |
|  |               |  | KMT2D       | G1234R            | 0.48854962             | 0.51567944             |
|  |               |  | CYP7B1      | A224S             | 0.47129506             | 0.4641791              |
|  |               |  | SYTL2       | A95T              | 0.47058824             | 0.50980392             |
|  |               |  | ACVR1B      | A35S              | 0.45792079             | 0.48517941             |
|  |               |  | HRNR        | S840T             | 0.44217687             | 0.44354839             |
|  |               |  | HRNR        | S2731L            | 0.1559633              | 0.0952381              |
|  |               |  | SMARCA4     | R1135Q            | 0.13274336             | 0.06321839             |
|  |               |  | LONRF1      | L584F             | 0.12953368             | 0.06952965             |
|  |               |  | CDH5        | T127S             | 0.09253731             | 0.05990783             |
|  |               |  | EML4-ALK    | translocation     | 0.0282023              | 0.0272473              |
|  |               |  | BRAF-AGK    | translocation     | 0.02668684             | 0.02799543             |
|  |               |  | CDH5        | E224Q             | 0.08284024             |                        |
|  |               |  | EZH2        | Splice site indel | 0.07407407             |                        |
